# Supplementary material
Source: PubMed Central journal article supplement (PMC7886946)
Supplement: 10278_2020_405_MOESM1_ESM.pdf [file 10278_2020_405_MOESM1_ESM.pdf]

# Evaluation of the student PACS training system (Weasis) questionnaire

Dear classmates, please consider helping us by completing this very brief 3-5 minute survey of your opinions on our radiology rotation during medical school

\* Required

If you agree to participate, you only need to complete the following anonymous online survey (signature of consent is not required and your email address for this questionnaire will not be recorded).

Informed Consent of Research Study (IRB: NCR191835):

[https://drive.google.com/file/d/1bY6q7fbgK\\_NxrgPaFNumRZS23Z\\_XzI5u/view?usp=sharing](https://drive.google.com/file/d/1bY6q7fbgK_NxrgPaFNumRZS23Z_XzI5u/view?usp=sharing)

## 1. Yes–no question (5) \*

*Mark only one oval per row.*

|                                                                           | Yes                   | No                    | N/A                   |
|---------------------------------------------------------------------------|-----------------------|-----------------------|-----------------------|
| Did you take any of the radiology courses while in GW SMHS?               | <input type="radio"/> | <input type="radio"/> | <input type="radio"/> |
| Did you know about the student PACS station (Weasis) during the rotation? | <input type="radio"/> | <input type="radio"/> | <input type="radio"/> |
| Did you use Weasis during the rotation?                                   | <input type="radio"/> | <input type="radio"/> | <input type="radio"/> |
| I would recommend Weasis to an MS3/MS4                                    | <input type="radio"/> | <input type="radio"/> | <input type="radio"/> |

## 2. Multiple choice (5) \*

Mark only one oval per row.

|                                                                                                                                   | Strongly Disagree     | Somewhat Disagree     | Neutral               | Somewhat Agree        | Strongly Agree        | N/A                   |
|-----------------------------------------------------------------------------------------------------------------------------------|-----------------------|-----------------------|-----------------------|-----------------------|-----------------------|-----------------------|
| I would like more active learning during the radiology rotation.                                                                  | <input type="radio"/> |
| The radiology rotation improved my confidence in initial image interpretation                                                     | <input type="radio"/> |
| I would like more hands on practice on a PACS system to interpret images during the radiology rotation                            | <input type="radio"/> |
| I found it too difficult to start off with Weasis to interpret images by myself                                                   | <input type="radio"/> |
| Weasis is superior than the traditional way (passive shadowing) of radiology teaching and it should be incorporated in the course | <input type="radio"/> |

## 3. What speciality do you intend to / did you apply to? \*

---

4. Approximately how many hours did you spend using Weasis ("0" if did not use)? \*

---

5. Additional comment (i.e. How change would you make for this rotation or any other questions that you might have)

---

---

This content is neither created nor endorsed by Google.

Google Forms
