# Supplementary material
Source: PubMed Central journal article supplement (PMC7886946)
Supplement: 10278_2020_405_MOESM2_ESM.pdf [file 10278_2020_405_MOESM2_ESM.pdf]

# Evaluation of the trainee PACS training system (Weasis) questionnaire for residents

Dear residents, please consider helping us by completing this very brief 3-5 minute survey of your opinions during neuroradiology rotation

\* Required

If you agree to participate, you only need to complete the following anonymous online survey (signature of consent is not required and your email address for this questionnaire will not be recorded).

Informed Consent of Research Study (IRB: NCR191835):

[https://drive.google.com/file/d/1bY6g7fbgK\\_NxrgPaFNumRZS23Z\\_XzI5u/view?usp=sharing](https://drive.google.com/file/d/1bY6g7fbgK_NxrgPaFNumRZS23Z_XzI5u/view?usp=sharing)

## 1. Yes–no question (5) \*

*Mark only one oval per row.*

|                                             | Yes                   | No                    | N/A                   |
|---------------------------------------------|-----------------------|-----------------------|-----------------------|
| Did you use Weasis?                         | <input type="radio"/> | <input type="radio"/> | <input type="radio"/> |
| I would recommend Weasis to other residents | <input type="radio"/> | <input type="radio"/> | <input type="radio"/> |

## 2. Multiple choice (5) \*

Mark only one oval per row.

|                                                                                                                                          | Strongly Disagree     | Somewhat Disagree     | Neutral               | Somewhat Agree        | Strongly Agree        | N/A                   |
|------------------------------------------------------------------------------------------------------------------------------------------|-----------------------|-----------------------|-----------------------|-----------------------|-----------------------|-----------------------|
| Weasis improved my confidence in image interpretation                                                                                    | <input type="radio"/> |
| I would like to use Weasis more                                                                                                          | <input type="radio"/> |
| I found it too difficult to navigate Weasis                                                                                              | <input type="radio"/> |
| Weasis should be incorporated into the PGY2 curriculum for residents and first month of fellowship curriculum for fellows                | <input type="radio"/> |
| Using Weasis cases without an available report, as opposed to those cases in PACS teaching files that have a report, was beneficial.     | <input type="radio"/> |
| The selective nature of the limited number of cases using Weasis, compared to the numerous cases in PACS teaching files, was beneficial. | <input type="radio"/> |

## 3. I am PGY? when I used Weasis \*

---

4. Approximately how many hours did you spend using weasis ("0" if did not use)? \*

---

5. Additional comments (suggestions, strengths, weaknesses, logistics, etc.)

---

---

This content is neither created nor endorsed by Google.

Google Forms
